# Supplementary material for: BP double bonds relieved from steric encumbrance: matrix-isolation infrared spectroscopy of the phosphaborene F2B–PBF and the triradical BPF3
Source: Royal Society of Chemistry journal article supplement (doi:10.1039/d4sc01913j), 2024-01-01
Supplement: d4sc01913j1.pdf [file d4sc01913j1.pdf]

## Supporting Information

### **B=P Double Bonds Relieved from Steric Encumbrance: Matrix-Isolation Infrared Spectroscopy of the Phosphaborene $F_2B-P=BF$ and the Triradical $B=PF_3$**

**Mei Wen,<sup>a</sup> Robert Medel,<sup>a</sup> Pavel Zasimov,<sup>a</sup> Carsten Müller,<sup>a</sup> Sebastian Riedel<sup>\*a</sup>**

<sup>a</sup> M. Sc. Mei Wen, Dr. Robert Medel, Dr. Pavel Zasimov, Dr. Carsten Müller, and Prof. Dr. Sebastian Riedel,  
Freie Universität Berlin, Institut für Chemie und Biochemie–Anorganische Chemie, Fabeckstrasse 34/36, 14195  
Berlin, Germany. E-Mail: s.riedel@fu-berlin.de

## Contents

|                                                                                                                                                                                                                              |    |
|------------------------------------------------------------------------------------------------------------------------------------------------------------------------------------------------------------------------------|----|
| <b>Experimental methods</b> .....                                                                                                                                                                                            | 4  |
| <b>Theoretical methods</b> .....                                                                                                                                                                                             | 4  |
| <b>Figure S1.</b> IR spectra in neon matrix of natural boron atoms and isotopic <sup>10</sup> -boron atoms reacted with PF <sub>3</sub> .....                                                                                | 5  |
| <b>Figure S2.</b> IR spectra in neon matrix of natural boron atoms and isotopic <sup>10</sup> -boron atoms reacted with PF <sub>3</sub> .....                                                                                | 6  |
| <b>Figure S3.</b> IR spectra in neon matrix of natural boron atoms and isotopic <sup>10</sup> -boron atoms reacted with PF <sub>3</sub> .....                                                                                | 7  |
| <b>Figure S4.</b> ETS-NOCV deformation maps for B=PF <sub>3</sub> (C <sub>3v</sub> , <sup>4</sup> A <sub>1</sub> ) .....                                                                                                     | 8  |
| <b>Figure S5.</b> Spin density of B=PF <sub>3</sub> (C <sub>3v</sub> , <sup>4</sup> A <sub>1</sub> ) and F <sub>2</sub> B–PF.....                                                                                            | 8  |
| <b>Table S1.</b> Calculated stretching wavenumbers $\nu$ (in cm <sup>-1</sup> ) and <sup>10/11</sup> B isotopic shifts of compounds <b>A</b> , <b>B</b> and <b>C</b> at the DFT level.....                                   | 9  |
| <b>Table S2.</b> Calculated stretching wavenumbers $\nu$ (in cm <sup>-1</sup> ) of compound <b>C</b> F <sub>2</sub> B–P=BF.....                                                                                              | 9  |
| <b>Table S3.</b> Observed and calculated stretching wavenumbers $\nu$ (in cm <sup>-1</sup> ) and <sup>10/11</sup> B isotopic shifts ( $\Delta\nu$ , cm <sup>-1</sup> ) of F <sub>3</sub> P–B≡B–PF <sub>3</sub> .....         | 9  |
| <b>Table S4.</b> All calculated stretching wavenumbers $\nu$ (in cm <sup>-1</sup> ) of F <sub>3</sub> P– <sup>11</sup> B≡ <sup>11</sup> B–PF <sub>3</sub> at the B3LYP/aug-cc-pVTZ level.....                                | 10 |
| <b>Table S5.</b> The energies E in (a.u.) and the difference energies $\Delta E$ in (kcal mol <sup>-1</sup> ) for a given basis set for the <sup>4</sup> A <sub>1</sub> and <sup>2</sup> A' states of BPF <sub>3</sub> ..... | 10 |
| <b>Figure S6.</b> Optimized geometry of dimer F <sub>3</sub> P– <sup>11</sup> B≡ <sup>11</sup> B–PF <sub>3</sub> at the B3LYP/aug-cc-pVTZ level of theory.....                                                               | 10 |
| <b>Table S6.</b> Calculated stretching wavenumbers $\nu$ (in cm <sup>-1</sup> ) and <sup>10/11</sup> B isotopic shifts ( $\Delta\nu$ , cm <sup>-1</sup> ) of B–PF <sub>3</sub> (C <sub>s</sub> , <sup>2</sup> A').....       | 11 |
| <b>Figure S7.</b> Optimized geometries of BPF <sub>3</sub> (C <sub>s</sub> , <sup>2</sup> A') compound at the CCSD(T)/aug-cc-pVTZ level of theory.....                                                                       | 11 |
| <b>Table S7.</b> Selected calculated properties of F <sub>2</sub> B–P=BF at CCSD(T)/aug-cc-pVTZ level.....                                                                                                                   | 11 |
| <b>Table S8.</b> All occupied orbitals contribution to Mulliken bond order for the B=P bond of F <sub>2</sub> B–P=BF at CCSD(T)/aug-cc-pVTZ level.....                                                                       | 12 |
| <b>Table S9.</b> All orbital occupancy-perturbed Mayer bond order <sup>[1]</sup> for the B=P bond of F <sub>2</sub> B–P=BF at CCSD(T)/aug-cc- pVTZ level.....                                                                | 13 |
| <b>Table S10.</b> All occupied orbitals contribution to Mulliken bond order for the P–B bond of F <sub>2</sub> B–P=BF at CCSD(T)/aug-cc-pVTZ level.....                                                                      | 14 |
| <b>Table S11.</b> All orbital occupancy-perturbed Mayer bond order <sup>[1]</sup> for the P–B bond of F <sub>2</sub> B–P=BF at CCSD(T)/aug-cc-pVTZ level.....                                                                | 15 |
| <b>Table S12.</b> All occupied orbitals contribution to Mulliken bond order for the B···B interaction in F <sub>2</sub> B–P=BF at CCSD(T)/aug-cc-pVTZ level.....                                                             | 16 |
| <b>Table S13.</b> All orbital occupancy-perturbed Mayer bond order <sup>[1]</sup> for the B···B interaction in F <sub>2</sub> B–P=BF at CCSD(T)/aug-cc-pVTZ level.....                                                       | 17 |
| <b>Table S14.</b> Wiberg bond order decomposition in NAO basis for the B···B interaction in F <sub>2</sub> B–P=BF at CCSD(T)/aug-cc-pVTZ level.....                                                                          | 18 |

|                                                                                                                                                                   |    |
|-------------------------------------------------------------------------------------------------------------------------------------------------------------------|----|
| <b>Figure.S8</b> Four predominant resonance structures (weight < 8%) and their weights for the compound $F_2B-P=BF$ at the B3LYP/aug-cc-pVTZ level of theory..... | 19 |
| <b>Figure S9.</b> Calculated properties for different small phosphaborenes $RB=PR'$ at CCSD(T)/aug-cc-pVTZ level.....                                             | 19 |
| <b>Figure S10.</b> Optimized structures for different small phosphaborenes $RB=PR'$ at the CCSD(T)/aug-cc-pVTZ level.....                                         | 20 |
| <b>Figure S11.</b> Isomers of compound C with relative energies in kcal mol <sup>-1</sup> calculated at B3LYP/aug-cc-pVTZ level of theory.....                    | 20 |
| <b>Figure S12.</b> Selected bonding molecular orbitals of dimer $F_3P-B\equiv B-PF_3$ calculated at B3LYP/aug-cc-pVTZ level of theory.....                        | 21 |
| <b>Figure S13.</b> Leading resonance structures for dimer $F_3P-B\equiv B-PF_3$ from natural resonance theory (NRT).....                                          | 21 |
| <b>Scheme S1.</b> Reaction mechanism for laser ablated boron atoms with $PF_3$ at the B3LYP/aug-cc-pVTZ level.....                                                | 22 |
| <b>Figure.S14.</b> Transition state structure (TS1-D) ( $^2A, C_1$ ) and its frequencies.....                                                                     | 22 |
| <b>Figure.S15.</b> Intrinsic reaction coordinate (IRC) via the transition state (TS1-D) ( $^2A, C_1$ ) for the mutual isomerization.....                          | 23 |
| <b>Figure.S16.</b> Transition state structure (TS1-Q) ( $^4A'', C_s$ ) and its frequencies.....                                                                   | 23 |
| <b>Figure.S17.</b> Intrinsic reaction coordinate (IRC) via the transition state (TS1-Q) ( $^4A'', C_s$ ) for the mutual isomerization.....                        | 24 |
| <b>Figure.S18.</b> Transition state structure (TS2-D) ( $^2A, C_1$ ) and its frequencies.....                                                                     | 24 |
| <b>Figure.S19.</b> Intrinsic reaction coordinate (IRC) via the transition state (TS2-D) ( $^2A, C_1$ ) for the mutual isomerization.....                          | 25 |
| <b>Figure.S20.</b> Transition state structure (TS2-Q) ( $^4A, C_1$ ) and its frequencies.....                                                                     | 25 |
| <b>Figure.S21.</b> Intrinsic reaction coordinate (IRC) via the transition state (TS2-Q) ( $^4A, C_1$ ) for the mutual isomerization.....                          | 26 |
| <b>Scheme S2.</b> Reaction mechanism for laser ablated two boron atoms with $PF_3$ at the B3LYP/aug-cc-pVTZ level.....                                            | 26 |
| Calculated atomic coordinates of compounds <b>A, B, C, D</b> , transition states and small phosphaborenes $RB=PR'$ .....                                          | 27 |
| <b>References</b> .....                                                                                                                                           | 31 |

## Experimental methods

The experimental setup for matrix isolation infrared spectroscopy has been described in more detail in our previous works.<sup>[2]</sup> Briefly, the 1064 nm fundamental of a Nd:YAG laser (Continuum, Minilite II, 10 Hz repetition rate) with energy of 50–65 mJ per 10 ns pulse was used to ablate a rotating bulk boron target to produce boron atoms. Natural abundance boron (<sup>10</sup>B, 19.8%; <sup>11</sup>B, 80.2%) or <sup>10</sup>B-enriched (> 95%) targets were used. The ablated boron atoms were co-deposited with 0.05% PF<sub>3</sub> (99%) in neon inside a high vacuum chamber onto a gold-plated copper mirror cooled to 5 K by using a closed-cycle helium cryostat (Sumitomo Heavy Industries, RDK-205D). FTIR spectra were recorded with a Bruker Vertex 80v spectrometer at 0.5 cm<sup>-1</sup> resolution in the region between 4000 and 450 cm<sup>-1</sup> using a liquid nitrogen cooled mercury cadmium telluride (MCT) detector. The matrix samples were irradiated with a 470 nm LED (Intelligent LED Solutions ILH-ON04-BLUE-SC211-WIR200) or a mercury arc lamp (Osram HQL 250, 175 W) with the outer globe removed.

## Theoretical methods

Structures and harmonic frequencies calculated with density functional theory (DFT) were performed using the Gaussian 16 program version A.03 package<sup>[3]</sup> employing the hybrid functional B3LYP.<sup>[4]</sup> The further high level coupled-cluster singles-doubles with perturbational triples excitations (CCSD(T))<sup>[5]</sup> calculations were carried out in the Molpro 2019.1.0. software package.<sup>[6]</sup> For all calculations, Dunning's correlation consistent polarized basis sets of triple-zeta quality with diffuse augmentation functions (aug-cc-pVTZ)<sup>[7]</sup> were used. The further wave-function analysis were carried out by NBO 7.0<sup>[8]</sup> and Multiwfn Version 3.8 (dev).<sup>[9]</sup> The latter software was also used to visualize the molecular orbitals. Molecular structures were visualized with the program Chemcraft version 1.8.<sup>[10]</sup>

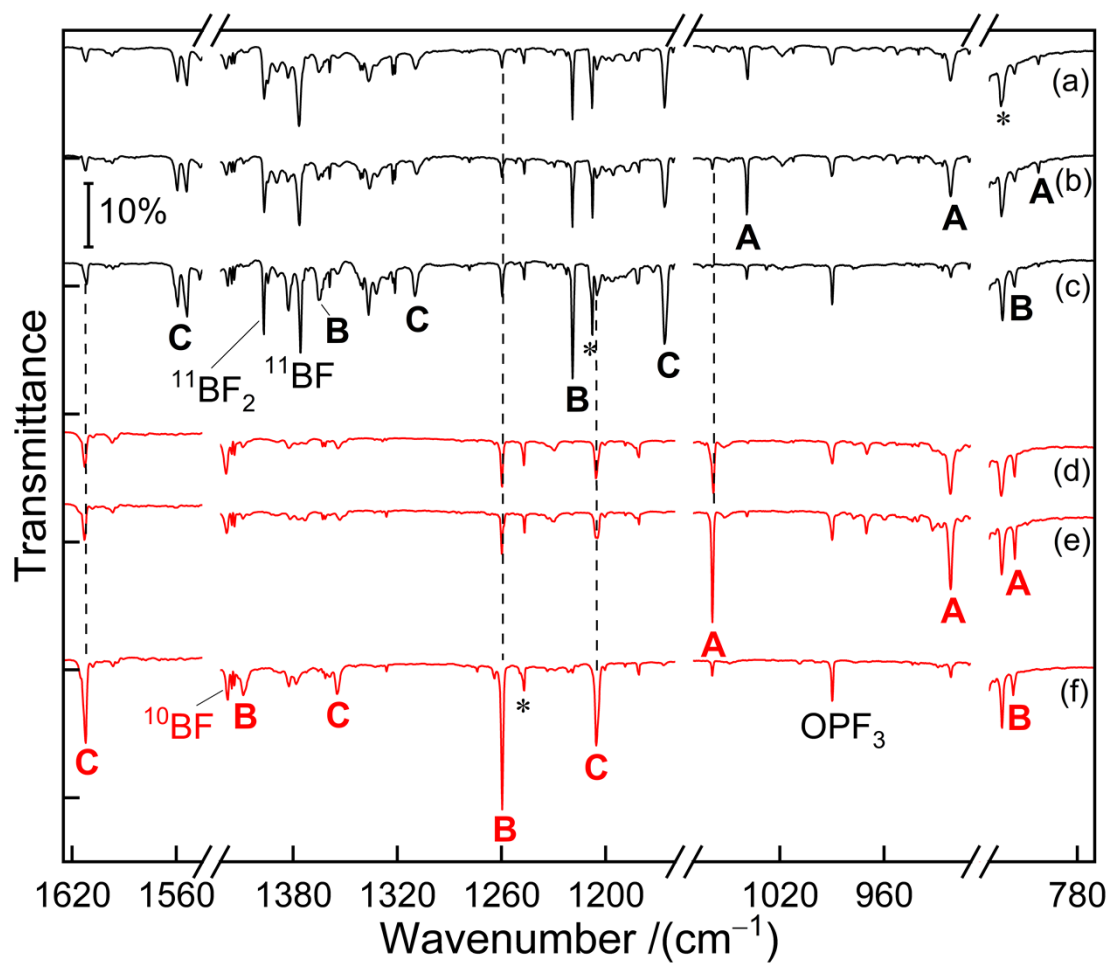

**Figure S1.** Infrared spectra obtained from codeposition of laser-ablated boron atoms in natural-abundance (a, b, c) and  $^{10}\text{B}$ -enriched (d, e, f) with 0.05%  $\text{PF}_3$  in neon (a, d), annealing to 9 K (b, e), and 15 min of  $\lambda > 220$  nm irradiation (c, f). **A:**  $\text{B}=\text{PF}_3$ , **B:**  $\text{F}_2\text{B}-\text{PF}$ , **C:**  $\text{F}_2\text{B}-\text{P}=\text{BF}$ , unassigned bands are marked with asterisks.

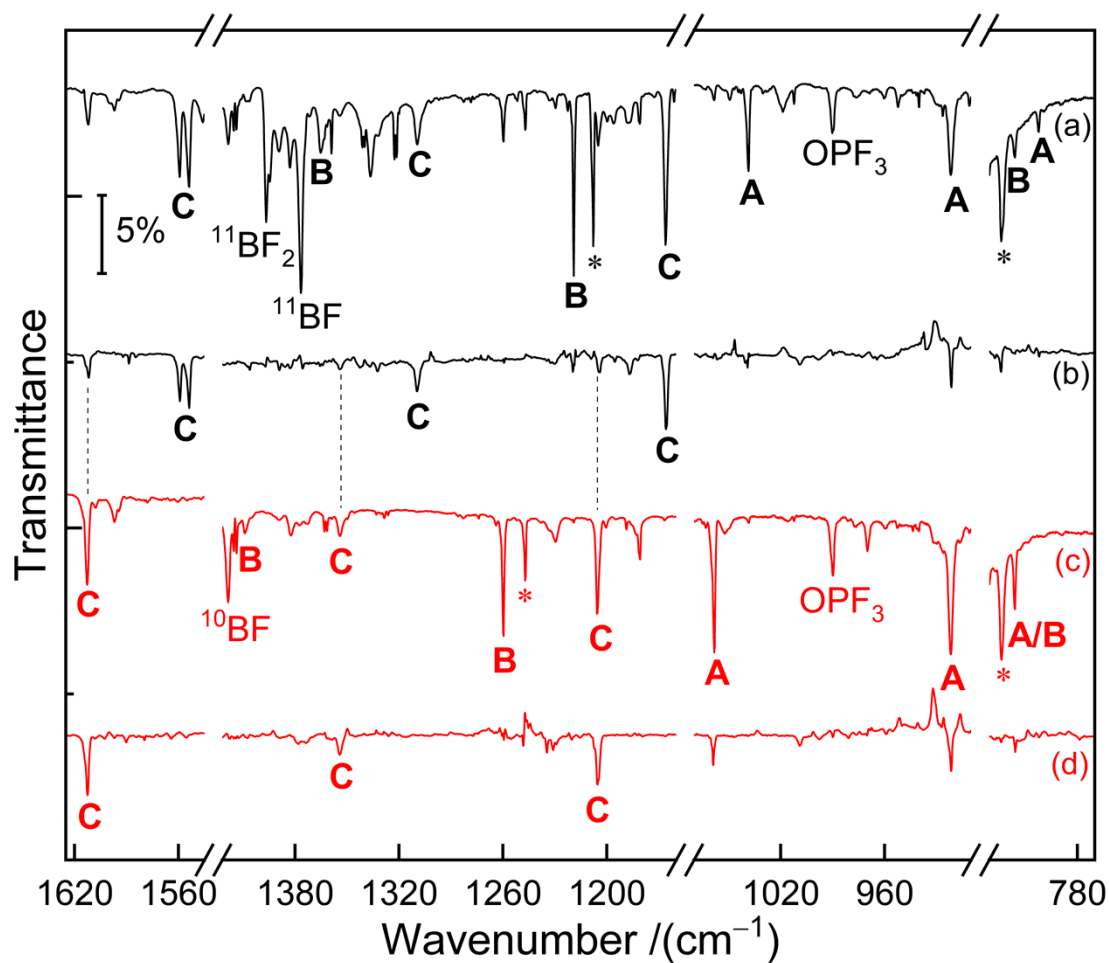

**Figure S2.** Infrared spectra obtained from codeposition of laser-ablated boron atoms in natural-abundance (a, b) and  $^{10}\text{B}$ -enriched (c, d) with 0.05%  $\text{PF}_3$  in solid neon. Spectra after 60 min of sample deposition at 5 K (a, c) and difference spectra observed after  $\lambda = 470$  nm LED irradiation for 10 min (b, d). A:  $\text{B}=\text{PF}_3$ , B:  $\text{F}_2\text{B}-\text{PF}$ , C:  $\text{F}_2\text{B}-\text{P}=\text{BF}$ , unassigned bands are marked with asterisks.

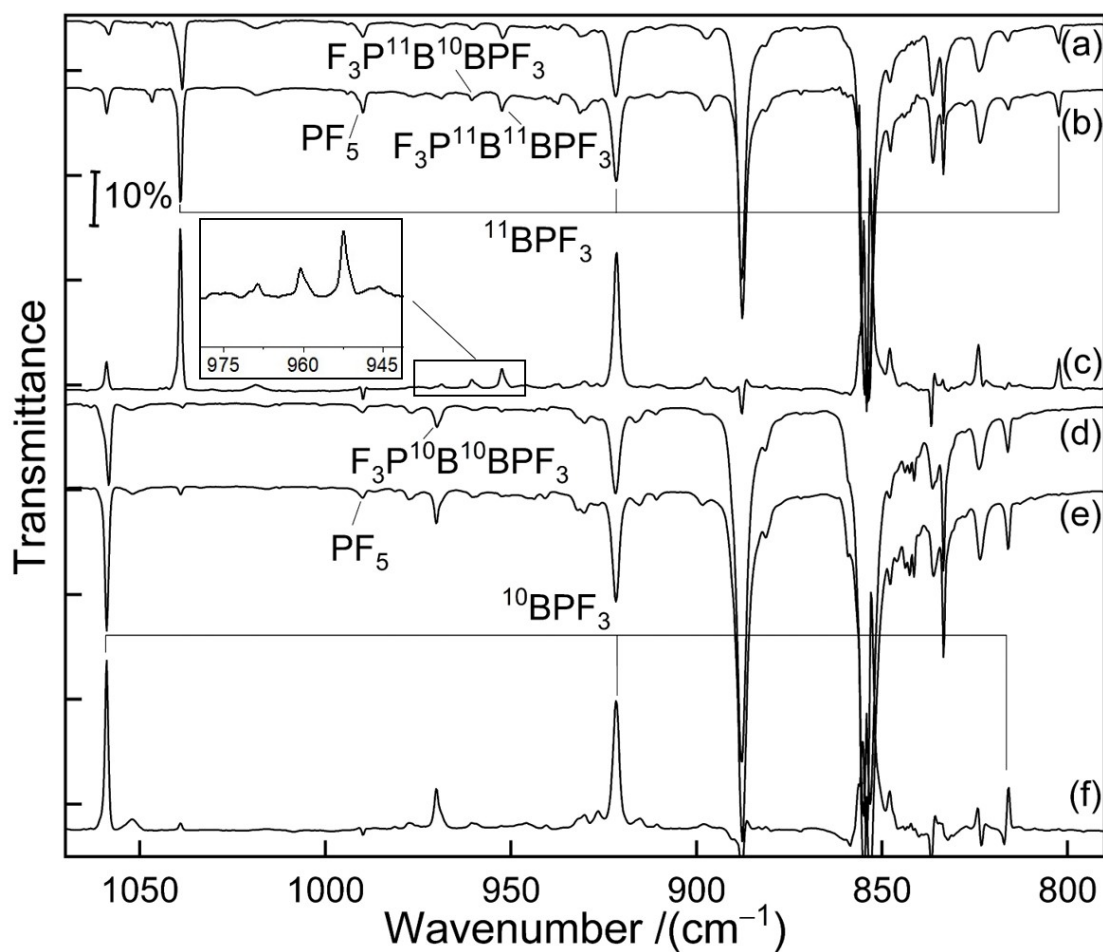

**Figure S3.** Infrared spectra obtained from codeposition of laser-ablated atoms in natural-abundance (a, b, c) and  $^{10}\text{B}$ -enriched (d, e, f) with 0.05%  $\text{PF}_3$  in neon (a, d), annealing to 9 K (b, e), and difference spectra observed after 15 min of  $\lambda > 220$  nm irradiation (c, f).

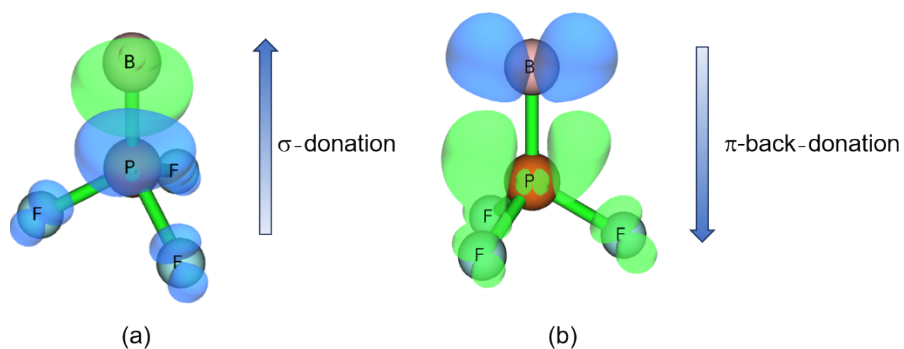

**Figure S4.** ETS-NOCV deformation maps for  $B=PF_3$  ( $C_{3v}$ ,  $^4A_1$ ). Electron density flows from blue to green upon fragment combination.

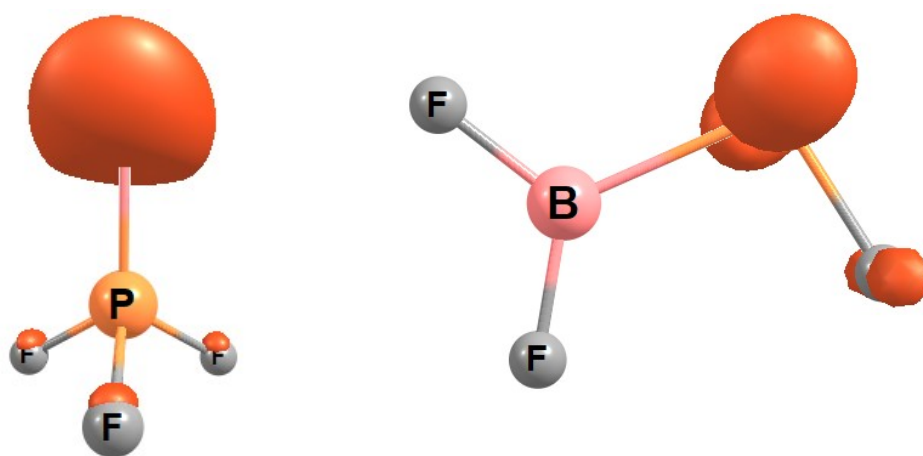

**Figure S5.** Spin density of  $B=PF_3$  ( $C_{3v}$ ,  $^4A_1$ ) (left) and  $F_2B-PF$  ( $C_s$ ,  $^2A''$ ) (right) at  $0.03 \text{ \AA}^{-3}$  calculated at B3LYP/aug-cc-pVTZ level.



**Table S1.** Calculated stretching wavenumbers  $\nu$  (in  $\text{cm}^{-1}$ ) and  $^{10/11}\text{B}$  isotopic shifts ( $\Delta\nu$ ,  $\text{cm}^{-1}$ ) at the B3LYP/aug-cc-pVTZ level for  $\text{B}=\text{PF}_3$  (**A**),  $\text{F}_2\text{B}-\text{PF}$  (**B**) and  $\text{F}_2\text{B}-\text{P}=\text{BF}$  (**C**) as well as IR intensities (in  $\text{km mol}^{-1}$ ) in parentheses.

|                                         | $\nu(^{10}\text{B})$   | $\Delta\nu(^{11}\text{B})$ | stretching mode                   |
|-----------------------------------------|------------------------|----------------------------|-----------------------------------|
| $\text{B}=\text{PF}_3$                  | 783.7 (84)             | 12.2                       | breathing                         |
| $(C_{3v}, ^4A_1)$                       | 875.9 (160 $\times$ 2) | 0.0                        | antis. $\text{PF}_3$              |
|                                         | 1044.8 (219)           | 21.9                       | $\text{B}=\text{P}$               |
| $\text{F}_2\text{B}-\text{PF}$          | 629.5 (8)              | 5.4                        | $\text{B}-\text{P}$               |
| $(C_s, ^2A'')$                          | 803.1 (114)            | 0.0                        | $\text{PF}$                       |
|                                         | 1250.7 (323)           | 40.0                       | sym. $\text{BF}_2$                |
|                                         | 1426.4 (295)           | 49.3                       | antis. $\text{BF}_2$              |
| $\text{F}_2\text{B}-\text{P}=\text{BF}$ | 626.0 (33)             | 5.0                        | $\text{B}-\text{P}$               |
| $(C_s, ^1A')$                           | 659.6 (2)              | 2.8                        | in-phase $\text{P}=\text{BF}$     |
|                                         | 1201.3 (569)           | 38.4                       | sym. $\text{BF}_2$                |
|                                         | 1361.3 (217)           | 46.5                       | antis. $\text{BF}_2$              |
|                                         | 1631.1 (548)           | 57.6                       | out-of-phase $\text{P}=\text{BF}$ |

**Table S2.** Calculated stretching wavenumbers  $\nu$  (in  $\text{cm}^{-1}$ ) at the B3LYP/aug-cc-pVTZ level for  $\text{F}_2\text{B}-\text{P}=\text{BF}$  (**C**) as well as IR intensities (in  $\text{km mol}^{-1}$ ) in parentheses.

|                                         | $\nu(^{10}\text{B}/^{10}\text{B})$ | $\nu(^{10}\text{B}/^{11}\text{B})$ | $\nu(^{11}\text{B}/^{10}\text{B})$ | $\nu(^{11}\text{B}/^{11}\text{B})$ | stretching mode                   |
|-----------------------------------------|------------------------------------|------------------------------------|------------------------------------|------------------------------------|-----------------------------------|
| $\text{F}_2\text{B}-\text{P}=\text{BF}$ | 626.0 (33)                         | 620.8 (36)                         | 625.9 (32)                         | 620.6 (35)                         | $\text{B}-\text{P}$               |
| $(C_s, ^1A')$                           | 659.6 (2)                          | 659.6 (2)                          | 656.8 (1)                          | 656.8 (1)                          | in-phase $\text{P}=\text{BF}$     |
|                                         | 1201.3 (569)                       | 1163.3 (520)                       | 1200.8 (570)                       | 1163.0 (521)                       | sym. $\text{BF}_2$                |
|                                         | 1361.3 (217)                       | 1315.0 (207)                       | 1361.1 (213)                       | 1314.8 (204)                       | antis. $\text{BF}_2$              |
|                                         | 1631.1 (548)                       | 1630.6 (547)                       | 1574.1 (510)                       | 1573.5 (509)                       | out-of-phase $\text{P}=\text{BF}$ |

**Table S3.** Observed and calculated stretching wavenumbers  $\nu$  (in  $\text{cm}^{-1}$ ) and  $^{10/11}\text{B}$  isotopic shifts ( $\Delta\nu$ ,  $\text{cm}^{-1}$ ) at the B3LYP/aug-cc-pVTZ level for the antisymmetric  $\text{P}-\text{B}$  stretching mode of  $\text{F}_3\text{P}-\text{B}=\text{B}-\text{PF}_3$  (**D**) as well as IR intensities (in  $\text{km mol}^{-1}$ ) in parentheses.

|                                                         | obs.  | cal.   | obs.                       | calc                       |
|---------------------------------------------------------|-------|--------|----------------------------|----------------------------|
|                                                         | $\nu$ | $\nu$  | $\Delta\nu(^{11}\text{B})$ | $\Delta\nu(^{11}\text{B})$ |
| $\text{F}_3\text{P}-^{11}\text{B}=\text{B}-\text{PF}_3$ | 952.5 | 940.5  |                            |                            |
| $(D_{3d}, ^1A_{1g})$                                    |       | (2075) |                            |                            |
| $\text{F}_3\text{P}-^{11}\text{B}=\text{B}-\text{PF}_3$ | 960.4 | 949.4  | 7.9                        | 8.9                        |
| $(D_{3d}, ^1A_{1g})$                                    |       | (2044) |                            |                            |
| $\text{F}_3\text{P}-^{10}\text{B}=\text{B}-\text{PF}_3$ | 970.0 | 960.0  | 9.6                        | 10.6                       |
| $(D_{3d}, ^1A_{1g})$                                    |       | (2015) |                            |                            |

**Table S4** All calculated vibrational wavenumbers  $\nu$  (in  $\text{cm}^{-1}$ ) of  $\text{F}_3\text{P}-^{11}\text{B}\equiv^{11}\text{B}-\text{PF}_3$  at the B3LYP/aug-cc-pVTZ level and the IR intensities (in  $\text{km mol}^{-1}$ ) in parentheses.

|                                                                   | cal.          |
|-------------------------------------------------------------------|---------------|
| $\text{F}_3\text{P}-^{11}\text{B}\equiv^{11}\text{B}-\text{PF}_3$ | 3.0 (0)       |
| $(D_{3d}, ^1A_{1g})$                                              | 29.9 (2·1)    |
|                                                                   | 103.5 (2·0)   |
|                                                                   | 220.9 (0)     |
|                                                                   | 271.6 (2·0)   |
|                                                                   | 305.2 (2·0)   |
|                                                                   | 389.1 (2·0)   |
|                                                                   | 393.7 (2·40)  |
|                                                                   | 445.4 (296)   |
|                                                                   | 535.6 (0)     |
|                                                                   | 778.1 (57)    |
|                                                                   | 906.7 (2·310) |
|                                                                   | 908.3 (2·0)   |
|                                                                   | 918.3 (0)     |
|                                                                   | 940.5 (2075)  |
|                                                                   | 1693.0 (0)    |

**Table S5** Energies and their differences for the  $^4A_1$  and  $^2A'$  states of  $\text{B}=\text{PF}_3$  with different basis sets. All energies were calculated at the geometry optimized with the aug-cc-pVTZ basis set and include ZPE corrections at this level.

| Basis set   | $E(^4A_1) / E_h$ | $E(^2A') / E_h$ | $\Delta E / \text{kcal mol}^{-1}$ |
|-------------|------------------|-----------------|-----------------------------------|
| aug-cc-pVTZ | -664.8519085     | -664.8545416    | 1.65                              |
| aug-cc-pVQZ | -664.9575655     | -664.9578932    | 0.21                              |
| aug-cc-pV5Z | -664.9956937     | -664.9947669    | -0.58                             |

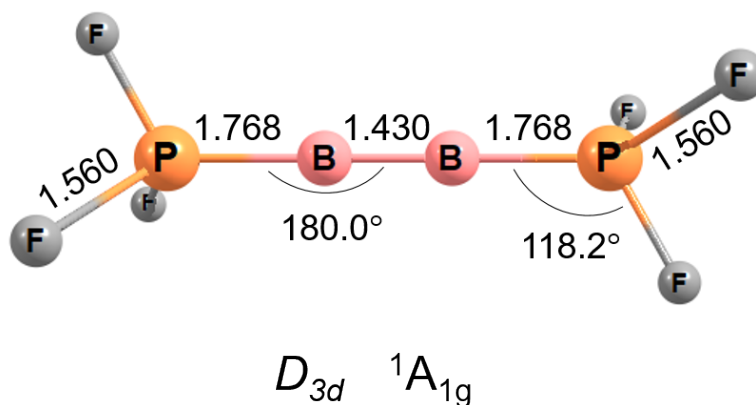

**Figure S6.** Optimized geometry of  $\text{F}_3\text{P}-\text{B}\equiv\text{B}-\text{PF}_3$  at the B3LYP/aug-cc-pVTZ level of theory. Bond lengths ( $\text{\AA}$ ) and bond angles ( $^\circ$ ) are annotated.

**Table S6.** Calculated stretching wavenumbers  $\nu$  (in  $\text{cm}^{-1}$ ) and  $^{10/11}\text{B}$  isotopic shifts ( $\Delta\nu$ ,  $\text{cm}^{-1}$ ) at the B3LYP/aug-cc-pVTZ and CCSD(T)/aug-cc-pVTZ levels for B–PF<sub>3</sub> ( $C_s$ ,  $^2A'$ ). IR intensities (in  $\text{km mol}^{-1}$ ) in parentheses.

|                    | cal.<br>(B3LYP)<br>$\nu(^{10}\text{B})$ | cal.<br>(CCSD(T))<br>$\nu(^{10}\text{B})$ | cal.<br>(B3LYP)<br>$\Delta\nu(^{11}\text{B})$ | cal.<br>(CCSD(T))<br>$\Delta\nu(^{11}\text{B})$ | mode                                  |
|--------------------|-----------------------------------------|-------------------------------------------|-----------------------------------------------|-------------------------------------------------|---------------------------------------|
| B–PF <sub>3</sub>  | 345.3 (27)                              | 362.7                                     | 7.5                                           | 8.4                                             | BP stretch/PF <sub>3</sub> bend       |
| ( $C_s$ , $^2A'$ ) | 485.1 (18)                              | 503.1                                     | 1.4                                           | 1.8                                             | BP stretch/PF <sub>3</sub> bend       |
|                    | 800.5 (227)                             | 850.0                                     | 0.1                                           | 0.1                                             | PF stretch                            |
|                    | 850.5 (231)                             | 884.5                                     | 0.2                                           | 0.3                                             | PF <sub>2</sub> symmetric stretch     |
|                    | 877.3 (156)                             | 915.5                                     | 0.0                                           | 0.0                                             | PF <sub>2</sub> antisymmetric stretch |

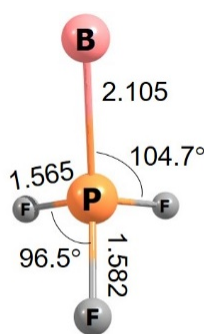

$C_s$   $^2A'$

**Figure S7.** Optimized geometry of doublet B–PF<sub>3</sub> at the CCSD(T)/aug-cc-pVTZ level of theory. Bond lengths (Å) and bond angles (°) are annotated.

**Table S7.** Selected calculated properties of F<sub>2</sub>B–P=BF at B3LYP and HF//CCSD(T) levels, both with aug-cc-pVTZ basis set.

| property                                                 | B3LYP   | HF//CCSD(T) |
|----------------------------------------------------------|---------|-------------|
| BPB angle                                                | 86.5°   | 83.3°       |
| B···B distance                                           | 2.513 Å | 2.445 Å     |
| Wiberg B···B bond order in NAO basis                     | 0.16    | -           |
| multi-center <sup>[11]</sup> BPB bond order in NAO basis | 0.18    | -           |
| Mayer B···B bond order <sup>[12]</sup>                   | 0.26    | 0.26        |
| Mulliken B···B bond order <sup>[13]</sup>                | 0.12    | 0.12        |

**Table S8.** Orbital contributions to Mulliken bond order for the B=P bond of F<sub>2</sub>B–P=BF based on the Hartree-Fock wavefunction using the structure optimized at CCSD(T)/aug-cc-pVTZ level. Leading contributions are highlighted.

| Orbital                    | Symmetry | Energy     | Contributes       |
|----------------------------|----------|------------|-------------------|
| HOMO–15                    | A'       | -1.71405   | -0.02263053       |
| HOMO–14                    | A'       | -1.65166   | 0.00017158        |
| HOMO–13                    | A'       | -1.61806   | -0.00449140       |
| <b>HOMO–12</b>             | A'       | -0.90035   | <b>0.27726266</b> |
| HOMO–11                    | A'       | -0.85729   | -0.02900871       |
| HOMO–10                    | A'       | -0.81639   | -0.00083665       |
| HOMO–9                     | A'       | -0.76887   | -0.00505582       |
| HOMO–8                     | A'       | -0.76880   | 0.00236880        |
| HOMO–7                     | A''      | -0.76397   | -0.01793687       |
| HOMO–6                     | A''      | -0.71977   | -0.00005339       |
| HOMO–5                     | A'       | -0.71420   | 0.13396779        |
| HOMO–4                     | A''      | -0.66633   | -0.00009835       |
| HOMO–3                     | A'       | -0.65920   | -0.00031986       |
| HOMO–2                     | A'       | -0.50454   | <b>0.41667067</b> |
| <b>HOMO–1</b>              | A'       | -0.43368   | 0.05974367        |
| <b>HOMO</b>                | A''      | -0.35270   | <b>0.45568582</b> |
| Total Mulliken bond order: |          | 1.26477285 |                   |

**Table S9.** Orbital occupancy-perturbed Mayer bond order<sup>[1]</sup> for the B=P bond of F<sub>2</sub>B–P=BF based on the Hartree-Fock wavefunction using the structure optimized at CCSD(T)/aug-cc-pVTZ level. Leading contributions are highlighted.

| Orbital                 | Symmetry | Energy   | Variance         |
|-------------------------|----------|----------|------------------|
| HOMO–15                 | A'       | -1.71405 | 0.022549         |
| HOMO–14                 | A'       | -1.65166 | -0.006054        |
| HOMO–13                 | A'       | -1.61806 | -0.000123        |
| <b>HOMO–12</b>          | A'       | -0.90035 | <b>-0.189162</b> |
| HOMO–11                 | A'       | -0.85729 | 0.014529         |
| HOMO–10                 | A'       | -0.81639 | -0.063331        |
| HOMO–9                  | A'       | -0.76887 | -0.019265        |
| HOMO–8                  | A'       | -0.76880 | -0.020841        |
| HOMO–7                  | A''      | -0.76397 | -0.016175        |
| HOMO–6                  | A''      | -0.71977 | -0.005656        |
| HOMO–5                  | A'       | -0.71420 | -0.182590        |
| HOMO–4                  | A''      | -0.66633 | -0.000377        |
| HOMO–3                  | A'       | -0.65920 | -0.013569        |
| <b>HOMO–2</b>           | A'       | -0.50454 | <b>-0.514335</b> |
| HOMO–1                  | A'       | -0.43368 | -0.141084        |
| <b>HOMO</b>             | A''      | -0.35270 | <b>-0.652683</b> |
| Total Mayer bond order: |          | 1.86922  |                  |

**Table S10.** Orbital contributions to Mulliken bond order for the P–B bond of F<sub>2</sub>B–P=BF based on the Hartree-Fock wavefunction using the structure optimized at CCSD(T)/aug-cc-pVTZ level. Leading contributions are highlighted.

| Orbital                    | Symmetry | Energy     | Contributes       |
|----------------------------|----------|------------|-------------------|
| HOMO–15                    | A'       | -1.71405   | -0.00181459       |
| HOMO–14                    | A'       | -1.65166   | 0.00106377        |
| HOMO–13                    | A'       | -1.61806   | 0.00084860        |
| <b>HOMO–12</b>             | A'       | -0.90035   | <b>0.27315894</b> |
| HOMO–11                    | A'       | -0.85729   | 0.05764208        |
| HOMO–10                    | A'       | -0.81639   | 0.08151648        |
| HOMO–9                     | A'       | -0.76887   | -0.00008063       |
| HOMO–8                     | A'       | -0.76880   | -0.00600820       |
| HOMO–7                     | A''      | -0.76397   | 0.01098869        |
| HOMO–6                     | A''      | -0.71977   | -0.00126161       |
| HOMO–5                     | A'       | -0.71420   | -0.10245818       |
| HOMO–4                     | A''      | -0.66633   | -0.00066567       |
| HOMO–3                     | A'       | -0.65920   | 0.00666790        |
| HOMO–2                     | A'       | -0.50454   | <b>0.24213504</b> |
| <b>HOMO–1</b>              | A'       | -0.43368   | 0.11381947        |
| <b>HOMO</b>                | A''      | -0.35270   | <b>0.19537098</b> |
| Total Mulliken bond order: |          | 0.87518037 |                   |

**Table S11.** Orbitals occupancy-perturbed Mayer bond order<sup>[1]</sup> for the P–B bond of F<sub>2</sub>B–P=BF based on the Hartree-Fock wavefunction using the structure optimized at CCSD(T)/aug-cc-pVTZ level. Leading contributions are highlighted.

| Orbital                 | Symmetry | Energy   | Variance         |
|-------------------------|----------|----------|------------------|
| HOMO–15                 | A'       | -1.71405 | -0.001394        |
| HOMO–14                 | A'       | -1.65166 | -0.008582        |
| HOMO–13                 | A'       | -1.61806 | -0.001618        |
| <b>HOMO–12</b>          | A'       | -0.90035 | <b>-0.289185</b> |
| HOMO–11                 | A'       | -0.85729 | -0.123285        |
| HOMO–10                 | A'       | -0.81639 | -0.035805        |
| HOMO–9                  | A'       | -0.76887 | -0.002634        |
| HOMO–8                  | A'       | -0.76880 | -0.006593        |
| HOMO–7                  | A''      | -0.76397 | -0.019961        |
| HOMO–6                  | A''      | -0.71977 | -0.014623        |
| HOMO–5                  | A'       | -0.71420 | 0.011819         |
| HOMO–4                  | A''      | -0.66633 | 0.000127         |
| HOMO–3                  | A'       | -0.65920 | -0.016436        |
| <b>HOMO–2</b>           | A'       | -0.50454 | <b>-0.352437</b> |
| HOMO–1                  | A'       | -0.43368 | -0.147845        |
| <b>HOMO</b>             | A''      | -0.35270 | <b>-0.225629</b> |
| Total Mayer bond order: |          | 1.206548 |                  |

**Table S12.** Orbital contributions to Mulliken bond order for the B $\cdots$ B interaction in F<sub>2</sub>B–P=BF based on the Hartree-Fock wavefunction using the structure optimized at CCSD(T)/aug-cc-pVTZ level. Leading contributions are highlighted.

| Orbital                    | Symmetry | Energy     | Contributes       |
|----------------------------|----------|------------|-------------------|
| HOMO–15                    | A'       | -1.71405   | 0.00958452        |
| HOMO–14                    | A'       | -1.65166   | 0.00777727        |
| HOMO–13                    | A'       | -1.61806   | -0.00555579       |
| <b>HOMO–12</b>             | A'       | -0.90035   | <b>0.09153395</b> |
| HOMO–11                    | A'       | -0.85729   | 0.02833409        |
| HOMO–10                    | A'       | -0.81639   | 0.01580359        |
| HOMO–9                     | A'       | -0.76887   | 0.00164331        |
| HOMO–8                     | A'       | -0.76880   | 0.00484815        |
| HOMO–7                     | A''      | -0.76397   | -0.03737224       |
| HOMO–6                     | A''      | -0.71977   | 0.00248406        |
| HOMO–5                     | A'       | -0.71420   | -0.04458106       |
| HOMO–4                     | A''      | -0.66633   | -0.00059706       |
| HOMO–3                     | A'       | -0.65920   | 0.00031735        |
| HOMO–2                     | A'       | -0.50454   | -0.10990616       |
| <b>HOMO–1</b>              | A'       | -0.43368   | <b>0.10525781</b> |
| <b>HOMO</b>                | A''      | -0.35270   | <b>0.05099353</b> |
| Total Mulliken bond order: |          | 0.11922158 |                   |



**Table S13.** Orbital occupancy-perturbed Mayer bond order<sup>[1]</sup> for the B···B interaction in F<sub>2</sub>B–P=BF based on the Hartree-Fock wavefunction using the structure optimized at CCSD(T)/aug-cc-pVTZ level. Leading contributions are highlighted.

| Orbital                 | Symmetry | Energy   | Variance         |
|-------------------------|----------|----------|------------------|
| HOMO–15                 | A'       | -1.71405 | -0.021041        |
| <b>HOMO–14</b>          | A'       | -1.65166 | <b>-0.050223</b> |
| HOMO–13                 | A'       | -1.61806 | 0.002624         |
| <b>HOMO–12</b>          | A'       | -0.90035 | <b>-0.030174</b> |
| HOMO–11                 | A'       | -0.85729 | -0.000453        |
| HOMO–10                 | A'       | -0.81639 | 0.009016         |
| HOMO–9                  | A'       | -0.76887 | -0.007897        |
| HOMO–8                  | A'       | -0.76880 | 0.002680         |
| HOMO–7                  | A''      | -0.76397 | -0.006245        |
| HOMO–6                  | A''      | -0.71977 | -0.007986        |
| HOMO–5                  | A'       | -0.71420 | 0.016624         |
| HOMO–4                  | A''      | -0.66633 | -0.000373        |
| HOMO–3                  | A'       | -0.65920 | -0.011383        |
| HOMO–2                  | A'       | -0.50454 | 0.168299         |
| <b>HOMO–1</b>           | A'       | -0.43368 | <b>-0.074272</b> |
| <b>HOMO</b>             | A''      | -0.35270 | <b>-0.084940</b> |
| Total Mayer bond order: |          | 0.259286 |                  |

**Table S14.** Wiberg bond order decomposition in NAO basis for the B $\cdots$ B interaction in F<sub>2</sub>B–P=BF based on the Hartree-Fock wavefunction using the structure optimized at the CCSD(T)/aug-cc-pVTZ level.

|         |             |     |             |
|---------|-------------|-----|-------------|
| Contri. | NAO type    |     | NAO type    |
| 0.0022  | Val( 2s) s  | --- | Val( 2s) s  |
| 0.0097  | Val( 2s) s  | --- | Val( 2p) px |
| 0.0270  | Val( 2s) s  | --- | Val( 2p) py |
| 0.0059  | Val( 2p) px | --- | Val( 2s) s  |
| 0.0030  | Val( 2p) px | --- | Val( 2p) px |
| 0.0037  | Val( 2p) px | --- | Val( 2p) py |
| 0.0023  | Val( 2p) py | --- | Val( 2s) s  |
| 0.0025  | Val( 2p) py | --- | Val( 2p) px |
| 0.0315  | Val( 2p) py | --- | Val( 2p) py |
| 0.0455  | Val( 2p) pz | --- | Val( 2p) pz |

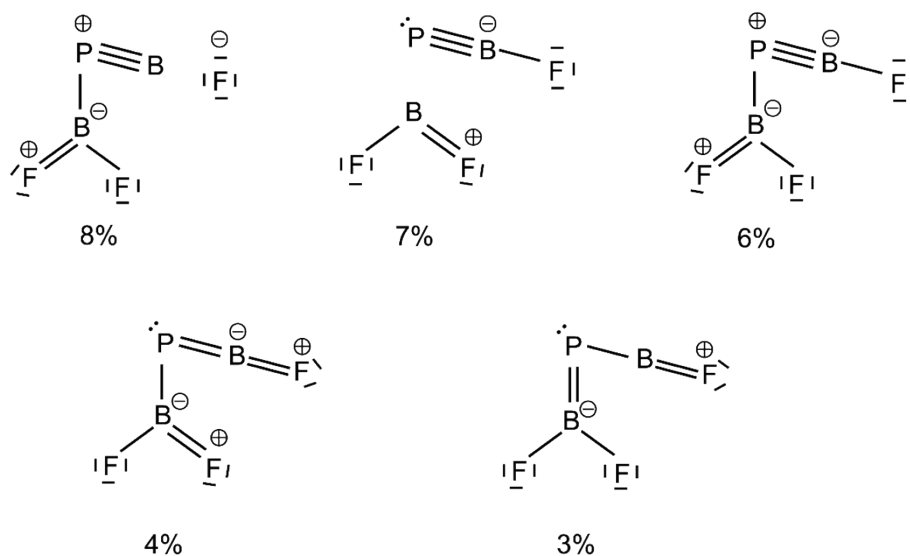

**Figure S8** Further resonance structures with weights between 2 and 8% for  $F_2B-P=BF$  at B3LYP/aug-cc-pVTZ level.

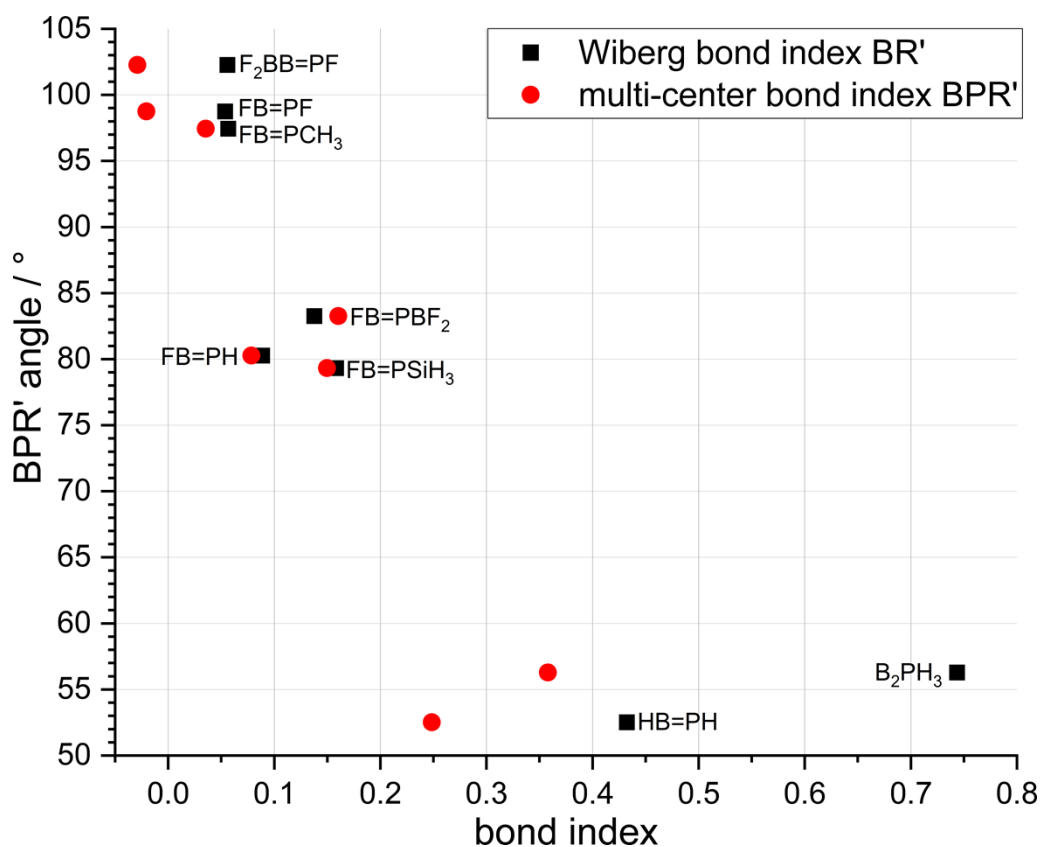

**Figure S9.** Correlation between the Wiberg bond index for the  $BR'$  interaction, the multi-center bond index<sup>[11]</sup> for the  $BPR'$  moiety (both in natural atomic orbital (NAO) basis) and the  $BPR'$  angle for different small phosphaborenes  $RB=PR'$ , calculated at HF/aug-cc-pVTZ//CCSD(T)/aug-cc-pVTZ level.

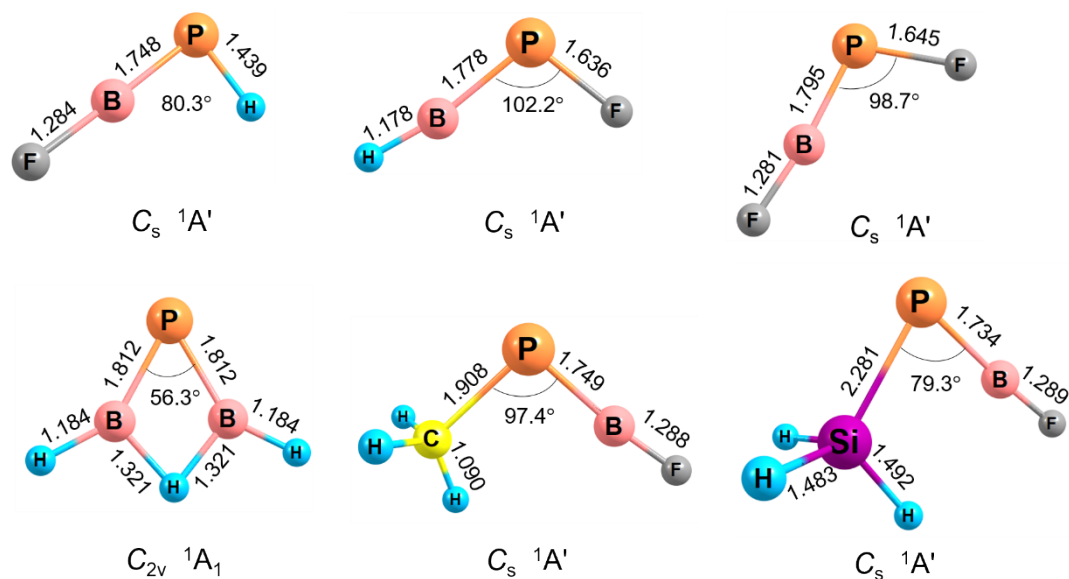

**Figure S10.** Optimized structures for different small phosphaborenes  $RB=PR'$  at the CCSD(T)/aug-cc-pVTZ level. Bond lengths (Å), bond angles (deg) and molecular symmetries are annotated.

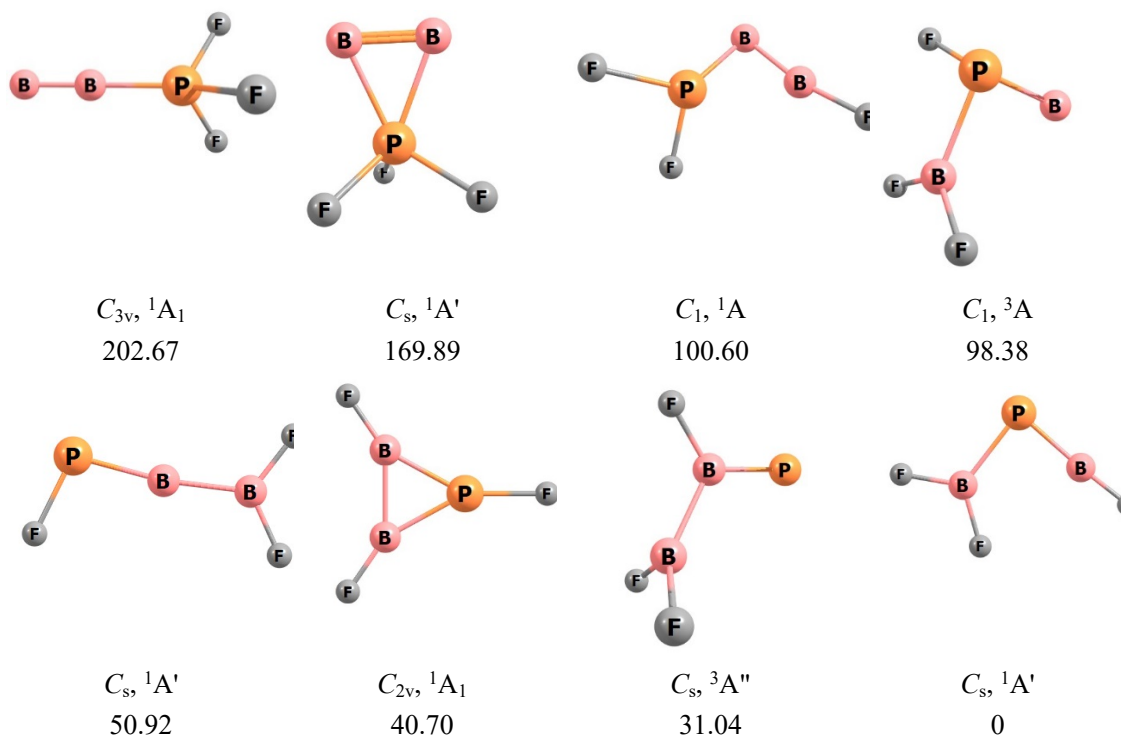

**Figure S11.** Isomers of the formula  $B_2PF_3$  with relative stabilities (electronic energies + ZPE correction) in  $\text{kcal mol}^{-1}$  calculated at B3LYP/aug-cc-pVTZ level of theory.

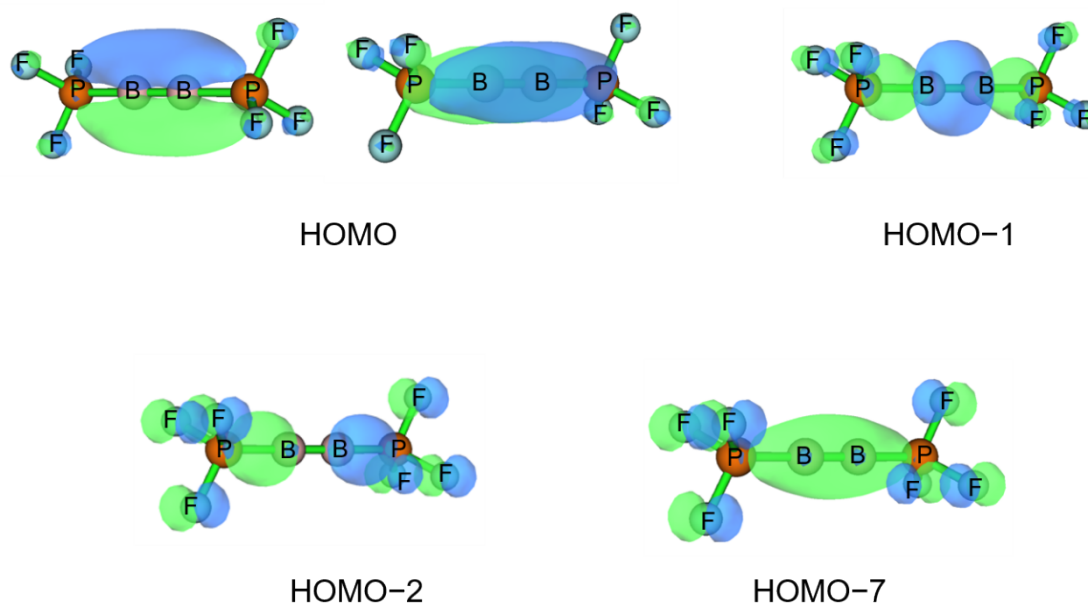

**Figure S12.** B–B and B–P bonding molecular orbitals of  $F_3P-B\equiv B-PF_3$  calculated at B3LYP/aug-cc-pVTZ level of theory.

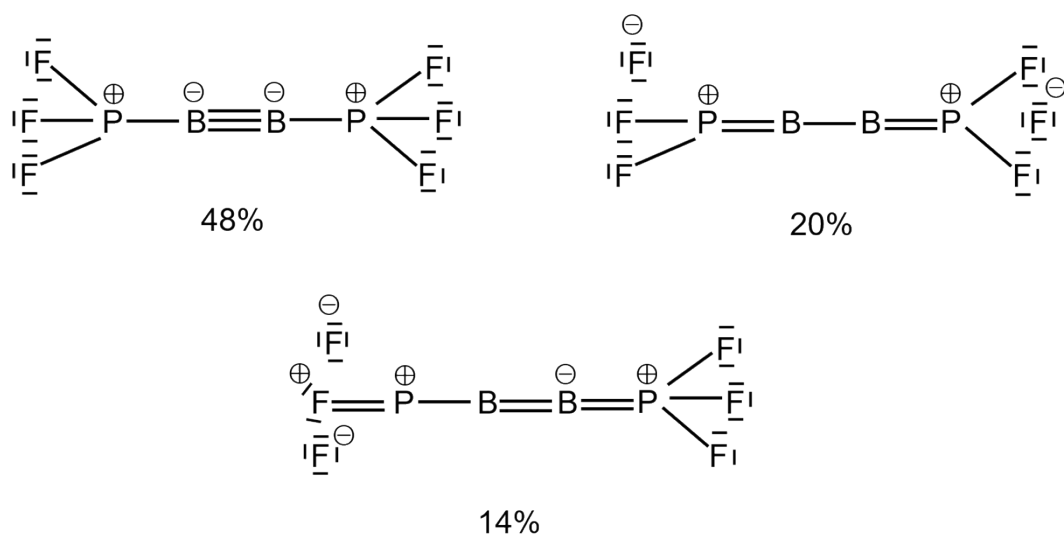

**Figure S13.** Leading resonance structure motifs for dimer  $F_3P-B\equiv B-PF_3$  from natural resonance theory (NRT). The weights of structures with the same P–B–B–P bond orders, irrespective of the P–F fluorine bond orders, were added up.

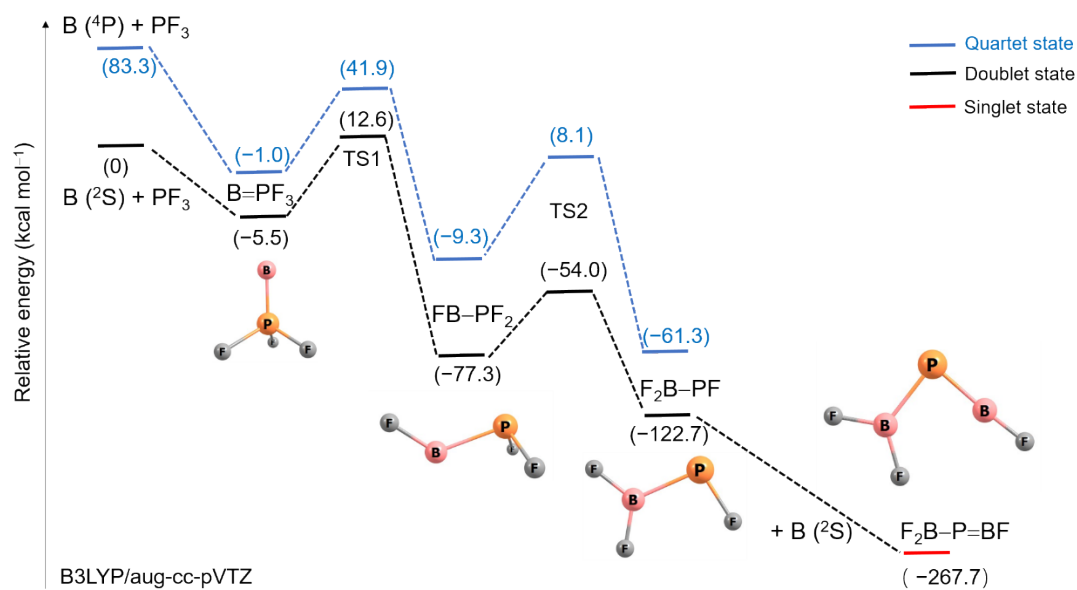

**Scheme S1.** Relative stabilities (electronic energies + ZPE correction) in kcal mol<sup>-1</sup> for species formed from laser ablated boron atoms with PF<sub>3</sub> at the B3LYP/aug-cc-pVTZ level (distances not to scale).

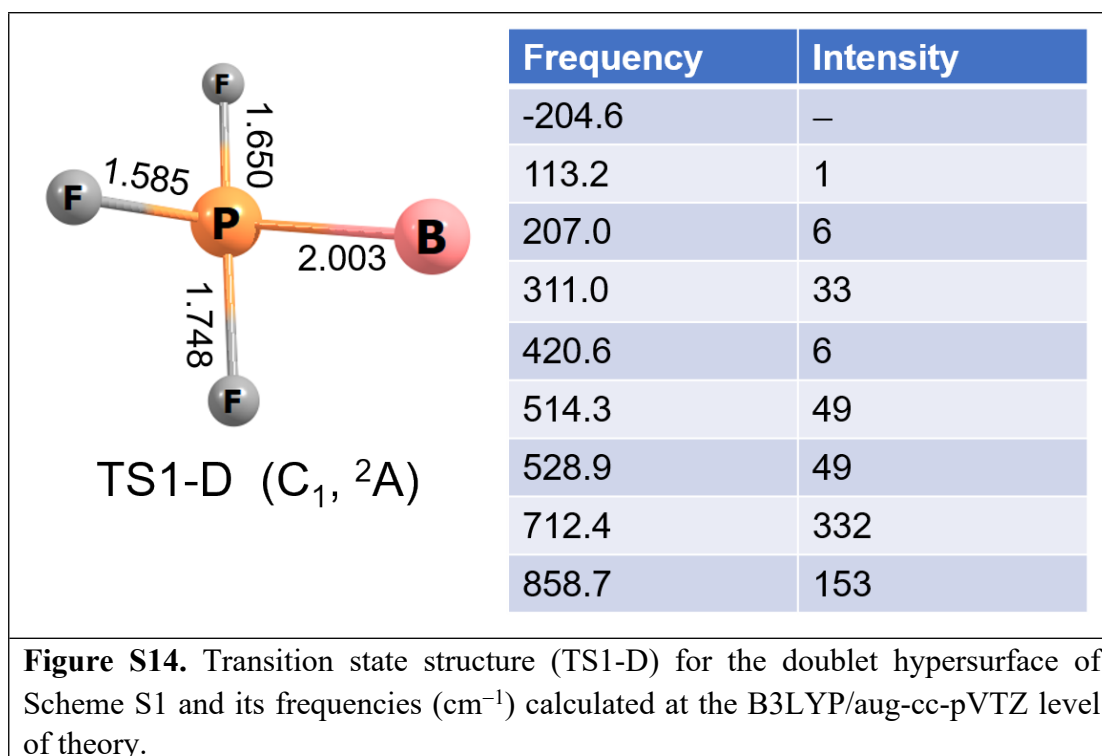

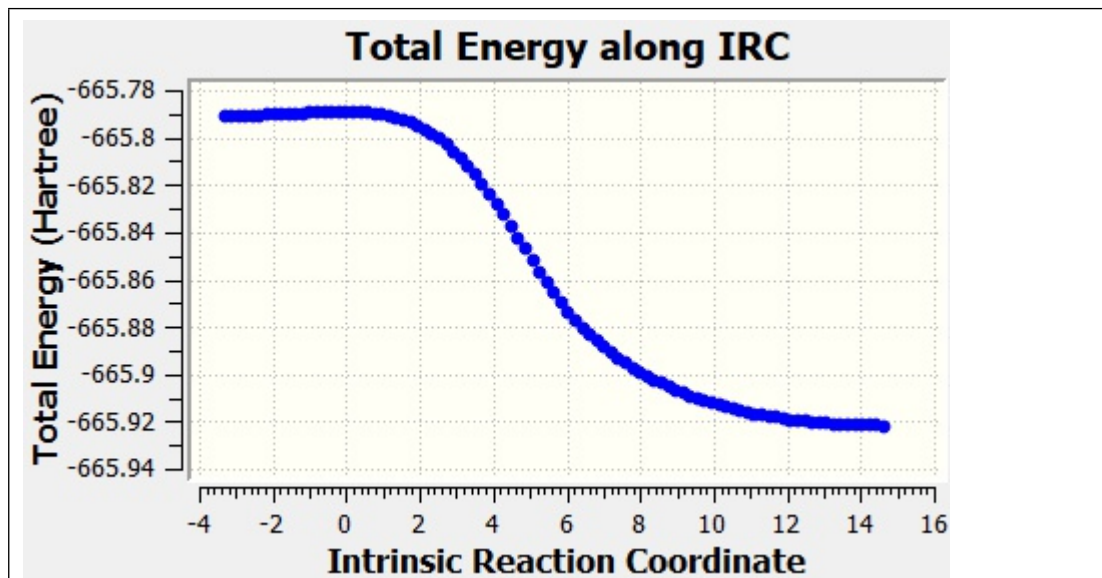

**Figure S15.** Intrinsic reaction coordinate (IRC) via the transition state TS1-D (Scheme S1) for the mutual isomerization of doublet B–PF<sub>3</sub> (*C<sub>s</sub>*, <sup>2</sup>A') and doublet FB–PF<sub>2</sub> (*C<sub>1</sub>*, <sup>2</sup>A) obtained at the B3LYP/aug-cc-pVTZ level of theory.

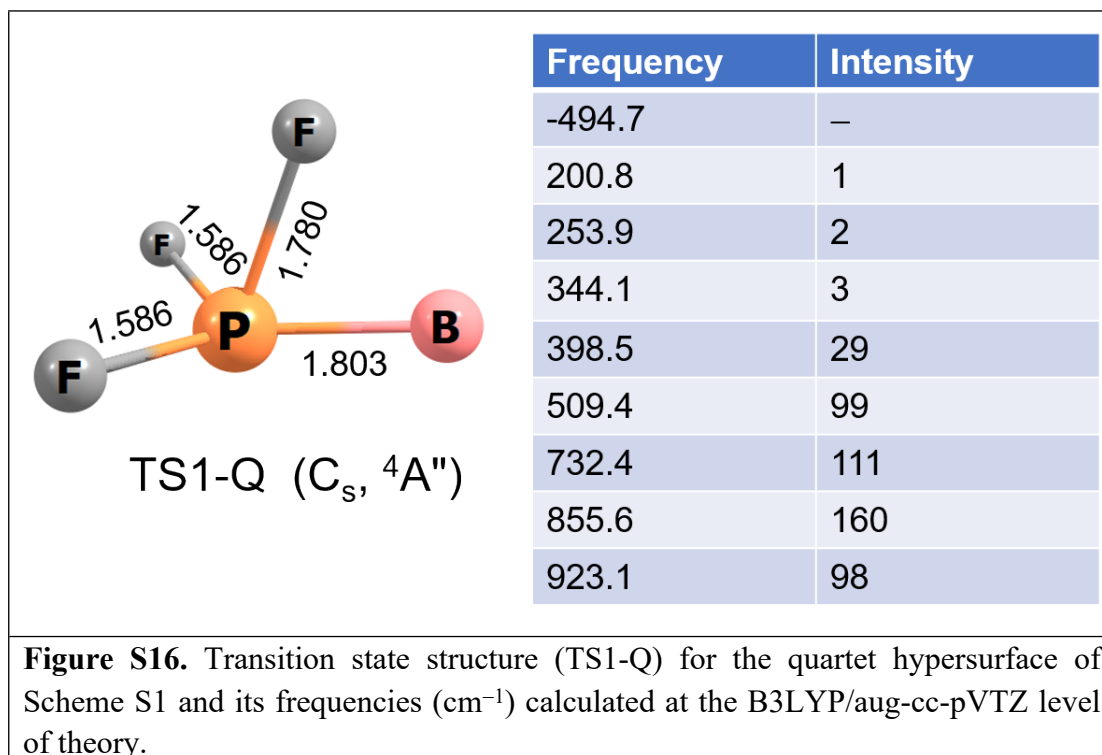

**Figure S16.** Transition state structure (TS1-Q) for the quartet hypersurface of Scheme S1 and its frequencies (cm<sup>-1</sup>) calculated at the B3LYP/aug-cc-pVTZ level of theory.

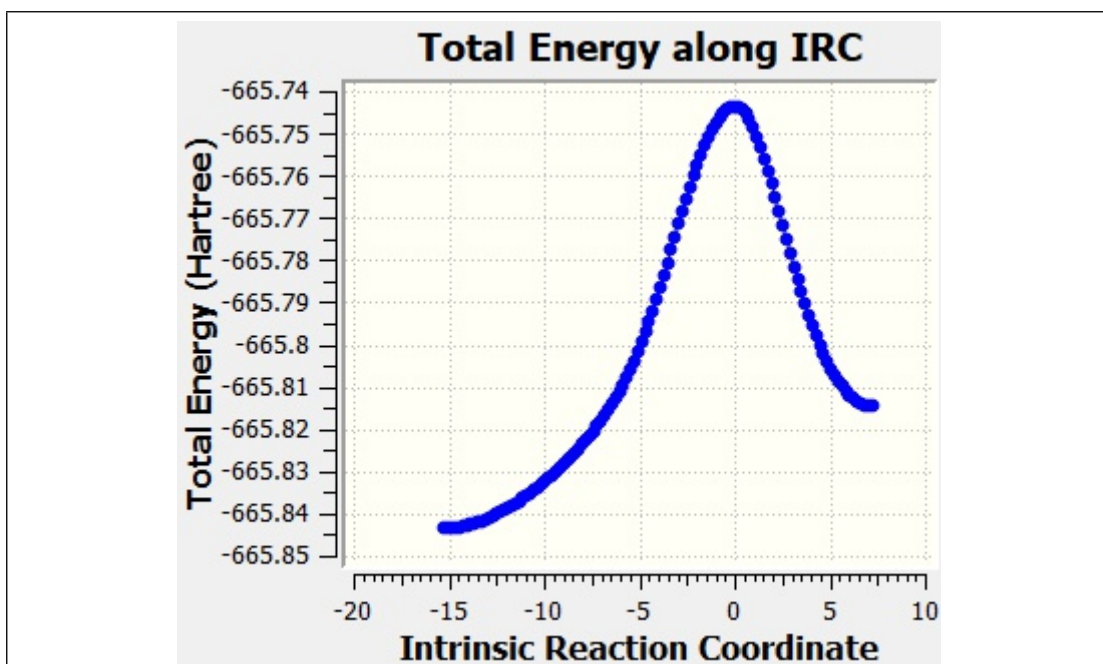

**Figure S17.** Intrinsic reaction coordinate (IRC) via the transition state TS1-Q (Scheme S1) for the mutual isomerization of quartet B=PF<sub>3</sub> (C<sub>3v</sub>, <sup>4</sup>A<sub>1</sub>) and quartet FB-PF<sub>2</sub> obtained at the B3LYP/aug-cc-pVTZ level of theory.

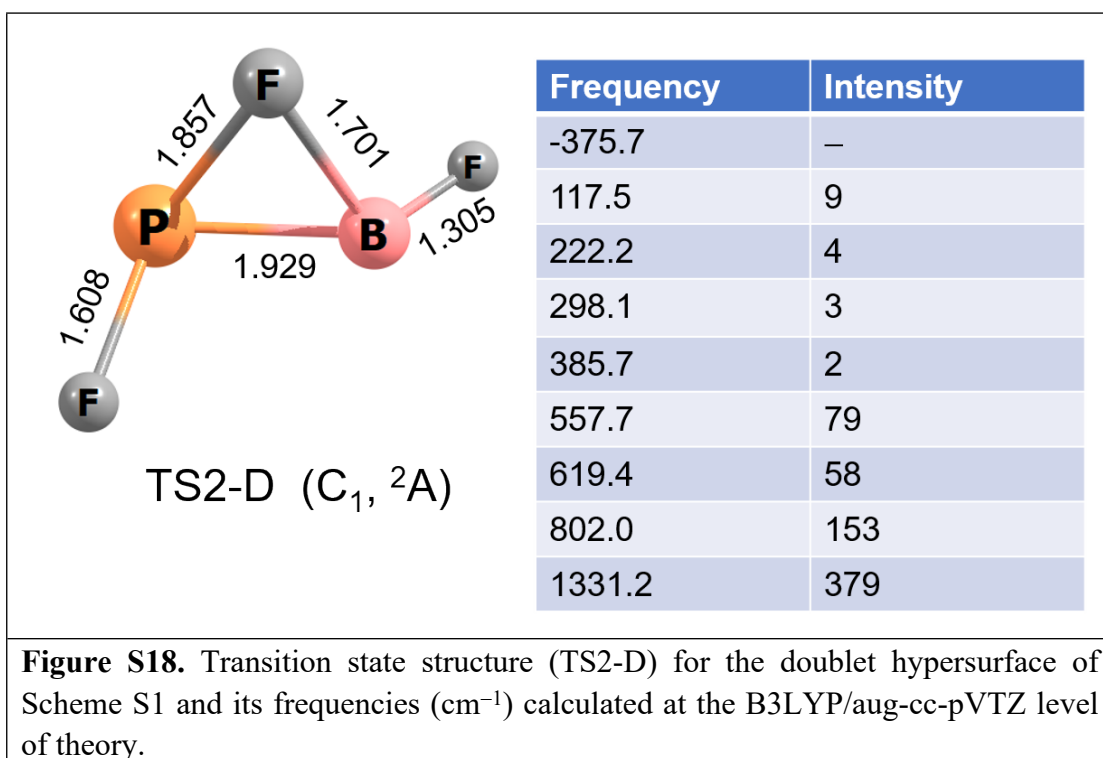

**Figure S18.** Transition state structure (TS2-D) for the doublet hypersurface of Scheme S1 and its frequencies (cm<sup>-1</sup>) calculated at the B3LYP/aug-cc-pVTZ level of theory.



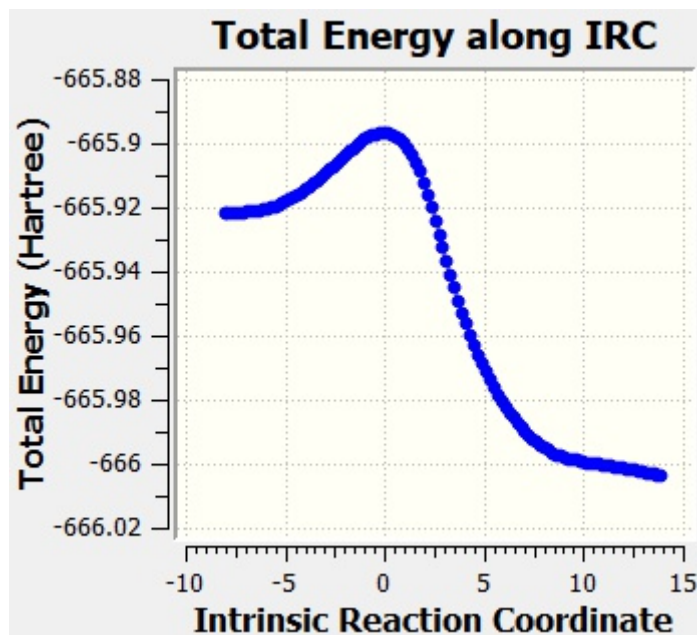

**Figure S19.** Intrinsic reaction coordinate (IRC) via the transition state TS2-D (Scheme S1) for the mutual isomerization of doublet FB–PF<sub>2</sub> and doublet F<sub>2</sub>B–PF obtained at the B3LYP/aug-cc-pVTZ level of theory.

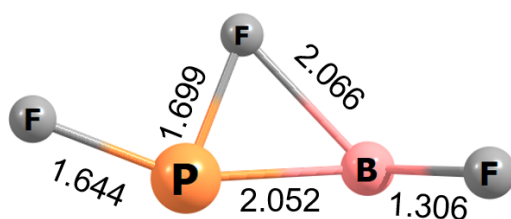

TS2-Q (C<sub>1</sub>, <sup>4</sup>A)

| Frequency | Intensity |
|-----------|-----------|
| -210.3    | –         |
| 116.4     | 5         |
| 141.7     | 2         |
| 279.3     | 1         |
| 367.6     | 9         |
| 487.7     | 85        |
| 633.6     | 38        |
| 729.3     | 146       |
| 1312.9    | 235       |

**Figure S20.** Transition state structure (TS2-Q) for the quartet hypersurface of Scheme S1 and its frequencies (cm<sup>-1</sup>) calculated at the B3LYP/aug-cc-pVTZ level of theory.

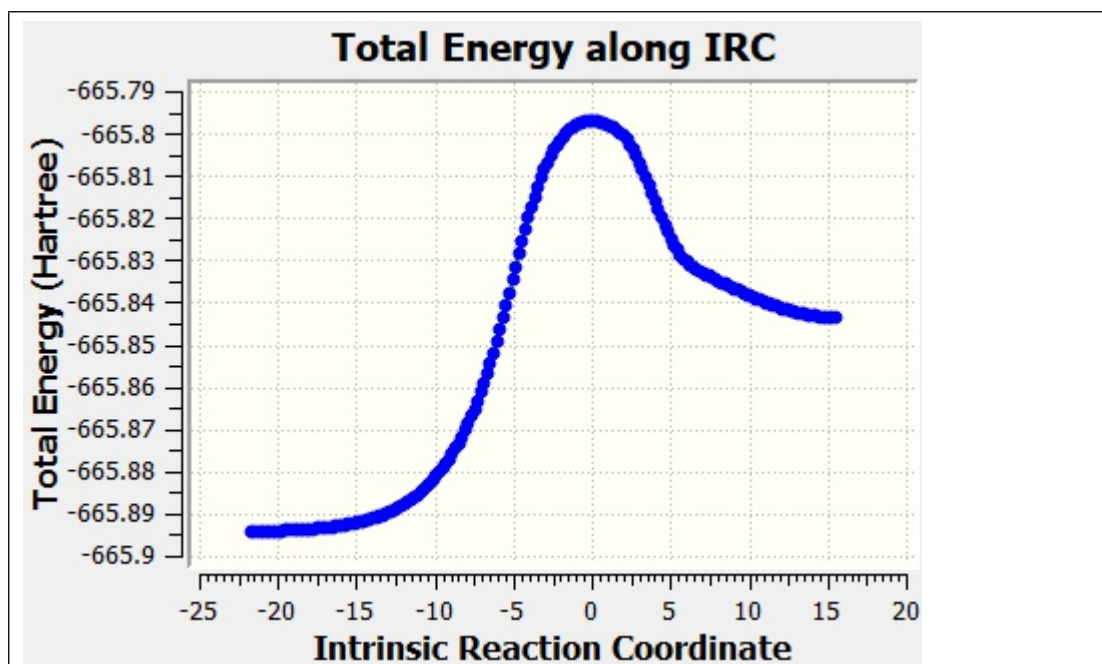

**Figure S21.** Intrinsic reaction coordinate (IRC) via the transition state TS2-Q (Scheme S1) for the mutual isomerization of quartet FB-PF<sub>2</sub> and quartet F<sub>2</sub>B-PF obtained at the B3LYP/aug-cc-pVTZ level of theory.

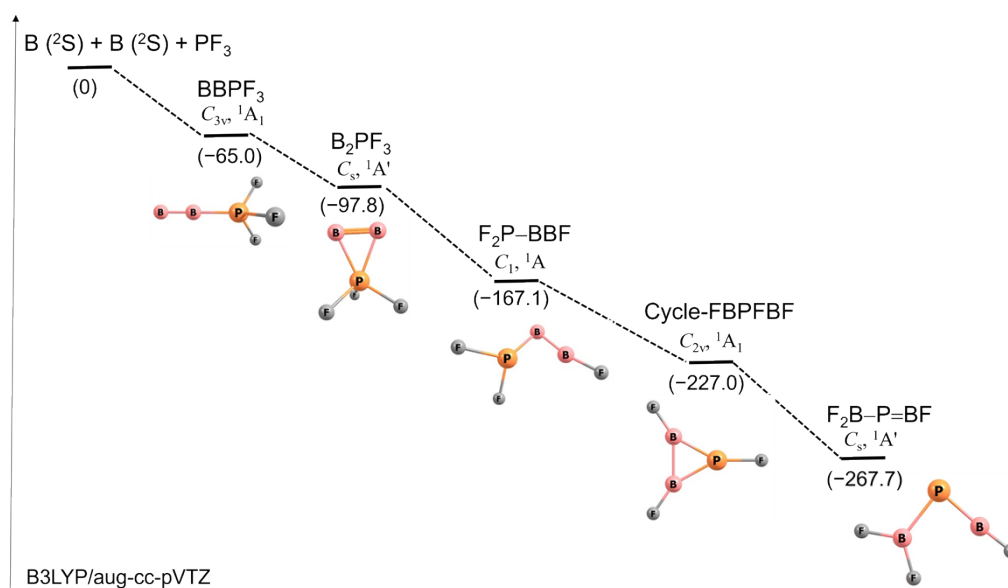

**Scheme S2.** Relative stabilities (electronic energies + ZPE correction) in kcal mol<sup>-1</sup> for F<sub>2</sub>B-P=BF species formed from laser ablated two boron atoms with PF<sub>3</sub> at the B3LYP/aug-cc-pVTZ level (distances not to scale).

Calculated atomic coordinates (in Å) of species for optimized structures at B3LYP/aug-cc-pVTZ level.

BPF<sub>3</sub> <sup>4</sup>A<sub>1</sub> (C<sub>3v</sub>)

|   |             |             |             |
|---|-------------|-------------|-------------|
| P | 0.00000000  | 0.00000000  | 0.24969200  |
| F | 0.00000000  | 1.37392500  | -0.51029900 |
| F | -1.18985400 | -0.68696200 | -0.51029900 |
| F | 1.18985400  | -0.68696200 | -0.51029900 |
| B | 0.00000000  | 0.00000000  | 2.00653900  |

BPF<sub>3</sub> <sup>2</sup>A' (C<sub>s</sub>)

|   |             |             |             |
|---|-------------|-------------|-------------|
| B | 2.10344100  | 0.93327600  | 0.00000000  |
| P | 0.24109500  | -0.07352800 | 0.00000000  |
| F | -0.52346800 | -1.47676000 | 0.00000000  |
| F | -0.52346800 | 0.54041000  | 1.23338600  |
| F | -0.52346800 | 0.54041000  | -1.23338600 |

F<sub>2</sub>PBF <sup>2</sup>A (C<sub>1</sub>)

|   |             |             |             |
|---|-------------|-------------|-------------|
| F | 0.31100690  | 0.80161472  | 1.33215440  |
| F | 0.31100690  | 0.80161472  | -1.33215440 |
| F | -0.02647023 | -2.38272985 | 0.00000000  |
| P | -0.51372484 | 0.50941220  | 0.00000000  |
| B | 0.46616201  | -1.23311982 | 0.00000000  |

F<sub>2</sub>PBF <sup>4</sup>A" (C<sub>s</sub>)

|   |             |             |             |
|---|-------------|-------------|-------------|
| F | 0.31958700  | -2.41283600 | 0.00000000  |
| F | 0.31958700  | 1.24948100  | 1.18076300  |
| F | 0.31958700  | 1.24948100  | -1.18076300 |
| P | -0.39452600 | 0.42039800  | 0.00000000  |
| B | -0.54219200 | -1.41622200 | 0.00000000  |

F<sub>2</sub>PBF <sup>2</sup>A" (C<sub>s</sub>)

|   |              |              |             |
|---|--------------|--------------|-------------|
| F | 1.283354126  | 1.119793743  | 0.000000000 |
| F | -0.871231959 | 1.829134604  | 0.000000000 |
| F | 0.724901785  | -1.761781536 | 0.000000000 |
| B | -0.002281607 | 0.830587579  | 0.000000000 |
| P | -0.680620345 | -0.989597389 | 0.000000000 |

F<sub>2</sub>PBF <sup>4</sup>A<sub>2</sub> (C<sub>2v</sub>)

|   |            |             |             |
|---|------------|-------------|-------------|
| F | 0.00000000 | 1.13835200  | -1.79130900 |
| F | 0.00000000 | -1.13835200 | -1.79130900 |
| F | 0.00000000 | 0.00000000  | 2.63199100  |
| B | 0.00000000 | 0.00000000  | -1.13466700 |
| P | 0.00000000 | 0.00000000  | 0.94859800  |

F<sub>2</sub>BPBF <sup>1</sup>A' (C<sub>s</sub>)

|   |             |             |            |
|---|-------------|-------------|------------|
| F | 1.33402400  | 0.95651800  | 0.00000000 |
| F | -0.49333500 | 2.27333900  | 0.00000000 |
| F | 1.13633100  | -2.28277600 | 0.00000000 |

|                                                                                   |             |             |             |
|-----------------------------------------------------------------------------------|-------------|-------------|-------------|
| B                                                                                 | 0.00000000  | 1.04226900  | 0.00000000  |
| P                                                                                 | -1.23935000 | -0.42704300 | 0.00000000  |
| B                                                                                 | 0.15941500  | -1.46588700 | 0.00000000  |
| TS1-D <sup>2</sup> A (C <sub>1</sub> )                                            |             |             |             |
| P                                                                                 | 0.07552200  | -0.10199600 | -0.26439500 |
| F                                                                                 | -1.64999800 | 0.16179700  | -0.34985200 |
| F                                                                                 | 1.70040200  | -0.38140700 | -0.19312400 |
| F                                                                                 | 0.22913900  | 1.26465700  | 0.52375000  |
| B                                                                                 | -0.72974500 | -1.57509800 | 0.82779200  |
| TS1-Q <sup>4</sup> A" (C <sub>s</sub> )                                           |             |             |             |
| P                                                                                 | -0.44531400 | -0.08750000 | 0.00000000  |
| F                                                                                 | 1.28205400  | -0.51695400 | 0.00000000  |
| F                                                                                 | -0.21125100 | 0.85234300  | 1.25648800  |
| F                                                                                 | -0.21125100 | 0.85234300  | -1.25648800 |
| B                                                                                 | -0.21125100 | -1.87541500 | 0.00000000  |
| TS2-D <sup>2</sup> A (C <sub>1</sub> )                                            |             |             |             |
| F                                                                                 | 1.81714600  | -0.50006200 | -0.50740300 |
| F                                                                                 | -0.40471000 | 1.21774200  | -0.28032900 |
| F                                                                                 | -2.15009400 | -0.53999100 | 0.02948500  |
| P                                                                                 | 0.74389400  | 0.02908400  | 0.56706700  |
| B                                                                                 | -0.90389600 | -0.40709100 | -0.33635400 |
| TS2-Q <sup>4</sup> A (C <sub>1</sub> )                                            |             |             |             |
| F                                                                                 | -2.33674200 | -0.20375500 | -0.34739100 |
| F                                                                                 | 2.09559100  | -0.12452800 | -0.22932400 |
| F                                                                                 | 0.14419400  | 1.16663200  | 0.02614500  |
| P                                                                                 | 0.53336200  | -0.48348100 | 0.13780300  |
| B                                                                                 | -1.42556300 | -0.05858600 | 0.57761900  |
| F <sub>3</sub> PBBPF <sub>3</sub> <sup>1</sup> A <sub>1g</sub> (D <sub>3d</sub> ) |             |             |             |
| P                                                                                 | 0.00000000  | 0.00000000  | 2.48280100  |
| F                                                                                 | 0.00000000  | 1.37540800  | 3.21976800  |
| F                                                                                 | 1.19113900  | -0.68770400 | 3.21976800  |
| F                                                                                 | -1.19113900 | -0.68770400 | 3.21976800  |
| B                                                                                 | 0.00000000  | 0.00000000  | 0.71490900  |
| P                                                                                 | 0.00000000  | 0.00000000  | -2.48280100 |
| F                                                                                 | -1.19113900 | 0.68770400  | -3.21976800 |
| F                                                                                 | 0.00000000  | -1.37540800 | -3.21976800 |
| F                                                                                 | 1.19113900  | 0.68770400  | -3.21976800 |
| B                                                                                 | 0.00000000  | 0.00000000  | -0.71490900 |

Calculated atomic coordinates (in Å) of species for optimized structures at CCSD(T)/aug-cc-pVTZ level.

BPF<sub>3</sub> <sup>4</sup>A<sub>1</sub> (C<sub>3v</sub>)

|   |              |              |              |
|---|--------------|--------------|--------------|
| P | -0.000008263 | 0.000000000  | -0.235793905 |
| F | 1.365090707  | 0.000000000  | 0.514615238  |
| F | -0.682537079 | -1.182190443 | 0.514595530  |
| F | -0.682537079 | 1.182190443  | 0.514595530  |
| B | -0.000008286 | 0.000000000  | -1.998128599 |

BPF<sub>3</sub> <sup>2</sup>A' (C<sub>s</sub>)

|   |              |              |              |
|---|--------------|--------------|--------------|
| B | 2.099889777  | 0.913607960  | 0.000000000  |
| P | 0.236597227  | -0.064726255 | 0.000000000  |
| F | -0.500472577 | -1.464542222 | 0.000000000  |
| F | -0.530941213 | 0.539734258  | 1.222213980  |
| F | -0.530941213 | 0.539734258  | -1.222213980 |

F<sub>2</sub>PBF <sup>2</sup>A (C<sub>1</sub>)

|   |              |              |              |
|---|--------------|--------------|--------------|
| F | -0.769760422 | 1.335360351  | -0.316191135 |
| F | -1.438081167 | -1.002822946 | -0.320083268 |
| F | 2.378735456  | -0.070126500 | 0.022337676  |
| P | -0.508092766 | -0.012568756 | 0.520449189  |
| B | 1.223511899  | -0.439383149 | -0.454077461 |

F<sub>2</sub>PBF <sup>4</sup>A" (C<sub>s</sub>)

|   |              |              |              |
|---|--------------|--------------|--------------|
| F | 0.329413417  | -2.401066767 | 0.000000000  |
| F | 0.321339691  | 1.241846469  | 1.165977190  |
| F | 0.321339691  | 1.241846469  | -1.165977190 |
| P | -0.395584769 | 0.424415172  | 0.000000000  |
| B | -0.554465030 | -1.416739343 | 0.000000000  |

F<sub>2</sub>PBF <sup>2</sup>A" (C<sub>s</sub>)

|   |              |              |              |
|---|--------------|--------------|--------------|
| F | -1.047088012 | 1.338529181  | -0.000028966 |
| F | -1.875622712 | -0.775827646 | -0.000000428 |
| F | 1.795483922  | 0.642823494  | 0.000003156  |
| B | -0.830569276 | 0.038062301  | -0.000006542 |
| P | 0.954284078  | -0.737473330 | 0.000017779  |

F<sub>2</sub>PBF <sup>4</sup>A<sub>2</sub> (C<sub>2v</sub>)

|   |             |              |              |
|---|-------------|--------------|--------------|
| F | 0.000000000 | -1.137759285 | 1.782569742  |
| F | 0.000000000 | 1.137759285  | 1.782569742  |
| F | 0.000000000 | 0.000000000  | -2.610781676 |
| B | 0.000000000 | 0.000000000  | 1.123007830  |
| P | 0.000000000 | 0.000000000  | -0.942187278 |

F<sub>2</sub>BPBF <sup>1</sup>A' (C<sub>s</sub>)

|   |              |              |             |
|---|--------------|--------------|-------------|
| F | 1.326575047  | 0.886162081  | 0.000000000 |
| F | -0.459718333 | 2.258017295  | 0.000000000 |
| F | 1.169454279  | -2.201833692 | 0.000000000 |
| B | -0.007634862 | 1.011588587  | 0.000000000 |

|                                 |              |              |              |
|---------------------------------|--------------|--------------|--------------|
| P                               | -1.284441205 | -0.428991901 | 0.000000000  |
| B                               | 0.152850074  | -1.428522369 | 0.000000000  |
| FBPH $^1A'$ ( $C_s$ )           |              |              |              |
| P                               | -0.106262398 | -1.218741190 | 0.000000000  |
| B                               | -0.004278009 | 0.526228466  | 0.000000000  |
| H                               | 1.323443088  | -1.058800760 | 0.000000000  |
| F                               | 0.038297319  | 1.809716483  | 0.000000000  |
| HBPF $^1A'$ ( $C_s$ )           |              |              |              |
| P                               | -0.068763595 | -1.093794200 | 0.000000000  |
| B                               | -0.017108476 | 0.683178238  | 0.000000000  |
| H                               | -0.186278844 | 1.848888661  | 0.000000000  |
| F                               | 1.519896535  | -1.484006388 | 0.000000000  |
| FBPF $^1A'$ ( $C_s$ )           |              |              |              |
| F                               | -0.330121324 | 2.195624319  | 0.000000000  |
| P                               | 0.657062866  | -0.711430516 | 0.000000000  |
| B                               | -0.008145425 | 0.956041352  | 0.000000000  |
| F                               | -0.759839116 | -1.546188156 | 0.000000000  |
| $H_2$ BPBH $^1A_1$ ( $C_{2v}$ ) |              |              |              |
| B                               | -0.854861196 | -0.775382696 | 0.000000000  |
| P                               | 0.000003719  | 0.822401911  | 0.000000000  |
| B                               | 0.854861480  | -0.775386265 | 0.000000000  |
| H                               | 1.903797054  | -1.323741234 | 0.000000000  |
| H                               | -1.903799680 | -1.323732048 | 0.000000000  |
| H                               | -0.000002376 | -1.781989668 | 0.000000000  |
| $CH_3$ PBF $^1A'$ ( $C_s$ )     |              |              |              |
| B                               | 0.960620542  | -0.038234764 | -0.000078580 |
| P                               | -0.621171727 | -0.784185087 | 0.000068358  |
| C                               | -1.651770909 | 0.821524335  | 0.000123999  |
| H                               | -2.283167555 | 0.807784499  | 0.888551872  |
| H                               | -2.283343335 | 0.807730070  | -0.888178149 |
| H                               | -1.061829139 | 1.736310367  | 0.000036935  |
| F                               | 2.172463122  | 0.396767580  | -0.000189436 |
| $CH_3$ PBF $^1A'$ ( $C_s$ )     |              |              |              |
| B                               | -1.145878939 | 0.036890237  | 0.000000325  |
| P                               | 0.076015537  | 1.267276195  | 0.000000248  |
| Si                              | 1.368933092  | -0.611848666 | 0.000000481  |
| H                               | 2.226873974  | -0.614286363 | 1.209647015  |
| H                               | 2.226872041  | -0.614288567 | -1.209647387 |
| H                               | 0.567435149  | -1.869797013 | -0.000000148 |
| F                               | -2.111002854 | -0.817557822 | 0.000000466  |

## References

- [1] S. I. Gorelsky, *J. Chem. Theory Comput.* **2012**, *8*, 908.
- [2] T. Schlöder, T. Vent-Schmidt, S. Riedel, *Angew. Chem. Int. Ed.* **2012**, *51*, 12063.
- [3] M. J. Frisch, G. W. Trucks, H. B. Schlegel, G. E. Scuseria, M. A. Robb, J. R. Cheeseman, G. Scalmani, V. Barone, G. A. Petersson, H. Nakatsuji, X. Li, M. Caricato, A. V. Marenich, J. Bloino, B. G. Janesko, R. Gomperts, B. Mennucci, H. P. Hratchian, J. V. Ortiz, A. F. Izmaylov, J. L. Sonnenberg, D. Williams-Young, F. Ding, F. Lipparini, F. Egidi, J. Goings, B. Peng, A. Petrone, T. Henderson, D. Ranasinghe, V. G. Zakrzewski, J. Gao, N. Rega, G. Zheng, W. Liang, M. Hada, M. Ehara, K. Toyota, R. Fukuda, J. Hasegawa, M. Ishida, T. Nakajima, Y. Honda, O. Kitao, H. Nakai, T. Vreven, K. Throssell, J. A. Montgomery, Jr., J. E. Peralta, F. Ogliaro, M. J. Bearpark, J. J. Heyd, E. N. Brothers, K. N. Kudin, V. N. Staroverov, T. A. Keith, R. Kobayashi, J. Normand, K. Raghavachari, A. P. Rendell, J. C. Burant, S. S. Iyengar, J. Tomasi, M. Cossi, J. M. Millam, M. Klene, C. Adamo, R. Cammi, J. W. Ochterski, R. L. Martin, K. Morokuma, O. Farkas, J. B. Foresman, and D. J. Fox, *Gaussian 16*, Gaussian, Inc., Wallingford CT, **2016**.
- [4] a) P. J. Stephens, F. J. Devlin, C. F. Chabalowski, M. J. Frisch, *J. Phys. Chem.* **1994**, *98*, 11623; b) A. D. Becke, *J. Chem. Phys.* **1993**, *98*, 5648; c) C. Lee, W. Yang, R. G. Parr, *Phys. Rev. B* **1988**, *37*, 785; d) S. H. Vosko, L. Wilk, M. Nusair, *Can. J. Phys.* **1980**, *58*, 1200.
- [5] a) K. Raghavachari, G. W. Trucks, J. A. Pople, M. Head-Gordon, *Chem. Phys. Lett.* **1989**, *157*, 479; b) G. D. Purvis, R. J. Bartlett, *J. Chem. Phys.* **1982**, *76*, 1910.
- [6] H.-J. Werner, P. J. Knowles, G. Knizia, F. R. Manby, M. Schütz, P. Celani, W. Györffy, D. Kats, T. Korona, R. Lindh, A. Mitrushenkov, G. Rauhut, K. R. Shamasundar, T. B. Adler, R. D. Amos, S. J. Bennie, A. Bernhardsson, A. Berning, D. L. Cooper, M. J. O. Deegan, A. J. Dobbyn, F. Eckert, E. Goll, C. Hampel, A. Hesselmann, G. Hetzer, T. Hrenar, G. Jansen, C. Köppl, S. J. R. Lee, Y. Liu, A. W. Lloyd, Q. Ma, R. A. Mata, A. J. May, S. J. McNicholas, W. Meyer, T. F. Miller III, M. E. Mura, A. Nicklass, D. P. O'Neill, P. Palmieri, D. Peng, K. Pflüger, R. Pitzer, M. Reiher, T. Shiozaki, H. Stoll, A. J. Stone, R. Tarroni, T. Thorsteinsson, M. Wang, M. Welborn, *MOLPRO, version 2019.2, a package of ab initio programs*.
- [7] R. A. Kendall, T. H. Dunning, R. J. Harrison, *J. Chem. Phys.* **1992**, *96*, 6796.
- [8] E. D. Glendening, J. K. Badenhoop, A. E. Reed, J. E. Carpenter, J. A. Bohmann, C. M. Morales, P. Karafiloglou, C. R. Landis, F. Weinhold, *NBO 7.0*, Theoretical Chemistry Institute, University of Wisconsin, Madison, WI, **2018**.
- [9] T. Lu, F. Chen, *J. Comput. Chem.* **2012**, *33*, 580.
- [10] G. A. Zhurko, *Chemcraft - graphical program for visualization of quantum chemistry computations*. <https://www.chemcraftprog.com>, Ivanovo (Russia), **2005**.
- [11] M. Giambiagi, M. S. de Giambiagi, K. C. Mundim, *Struct. Chem.* **1990**, *1*, 423.
- [12] A. J. Bridgeman, G. Cavigliasso, L. R. Ireland, J. Rothery, *J. Chem. Soc., Dalton Trans.* **2001**, 2095.
- [13] R. S. Mulliken, *J. Chem. Phys.* **1955**, *23*, 1833.
